## In-hospital prognosis in patients with myocardial infarction and atrial fibrillation

Leonova I.; Solovyeva M.; Boldueva S.; Bykova E.

North-Western State Medical University named after I.I. Mechnikov, Saint Petersburg, Russian Federation

**Funding Acknowledgements:** Type of funding sources: None.

**Introduction:** The number of patients with myocardial infarction (MI) and atrial fibrillation (AF) is increasing every year.

**Purpose:** to assess the incidence of AF among the patients with MI, the features of the in-hospital prognosis among the patients with MI and AF compared with MI without AF.

**Methods:** The patients with type 1 MI and preexisting AF have been selected from all MI patients MI admitted in 2013-18. They have formed the main group (100 patients). The control group (200 patients with type 1 MI without AF), has been created by "pair selection" method. Patients in the groups did not differ in gender, age, MI date and had not severe comorbidities.

**Results:** 1660 patients with MI were analyzed. AF occurred in 309 patients (18.6% of patients with MI). Preexisting AF was in 59.2%. Patients with MI and AF were older than MI without AF (mean age  $75.2 \pm 10.1$  versus  $64.6 \pm 12.8$ ,  $p < 0.0001$ ) with women's prevalence (52.4% versus 35.5%,  $p < 0.0001$ ). Type 1 MI predominates among all patients. Type 2 MI occurred 5 times more often among main group ( $p < 0.0001$ ). 2 groups were adjusted for sex (58% of women in both groups), age (mean age  $75.5 \pm 8, 7$  in the main versus  $75.2 \pm 8.5$  in the control group,  $p = 0.775$ ). Diabetes (45% versus 31.5%,  $p = 0.030$ ), previous MI (40% versus 25.5%,  $p = 0.012$ ) and stroke (21% versus 11.5%,  $p = 0.037$ ) were more common in the main than in the control. Patients with MI and AF had lower GFR ( $56.8 \pm 19.4$  versus  $61.7 \pm 17.9$  ml/min/1.73 m<sup>2</sup>,  $p = 0.031$ ), LDL ( $2.8 \pm 0.9$  versus  $3.3 \pm 1.0$  mmol/L,  $p = 0.0002$ ). Patients with AF had a lower left ventricular ejection fraction ( $55.2 \pm 10.5$  versus  $59.8 \pm 10.0$  %,  $p = 0.0005$ ). Significant mitral regurgitation was more common in the main group (53.9% versus 30.3% in the control group,  $p = 0.0002$ ). There were no differences in the incidence of acute heart failure (HF) Killip's 3-4 (20% versus 13%,  $p = 0.127$ ). Patients did not differ in the number of affected coronary artery ( $p = 0.7327$ ), the level of stenosis ( $p = 0.1956$ ), in the frequency of revascularization ( $p = 0.0686$ ). Patients with MI and AF had worse in-hospital prognosis. Pulmonary embolism (PE) (9% in main versus 1% in control group,  $p = 0.0011$ ), minor bleeding (21% versus 9.5%,  $p = 0.0057$ ), combined endpoint (stroke + PE + mortality) (19% versus 10.5%,  $p = 0.0415$ ) were more common in the main group. At discharge, patients with AF had HF III NYHA in 21.8% cases versus 5.5% in patients without AF,  $p = 0.0001$ . There were no significant differences in other in-hospital endpoints (recurrent myocardial infarction, stroke, major bleeding, and mortality) between the groups. In-hospital mortality was 13% in the main versus 9.5% in the control group ( $p = 0.4276$ ).

**Conclusion:** AF occurs in 18.6% of patients with MI. Patients with AF and MI are older with female prevalence. Type 1 MI predominates. Patients with type 1 MI and pre-existing AF is a group of high risk because of more severe HF, PE, minor bleeding and combined endpoint (stroke + PE + mortality)
